# Supplementary material
Source: PubMed Central journal article supplement (PMC7758891)
Supplement: ao0c03871_si_002.pdf [file ao0c03871_si_002.pdf]

## Supporting Information

Discovery of Novel Coumarin Analogs against  $\alpha$ -  
glucosidase Protein Target of Diabetes mellitus:  
Pharmacophore-based QSAR, Docking, and Molecular  
Dynamics Simulation Studies

*Akhilesh Kumar Maurya, Viswajit Mulpuru, Nidhi Mishra\**

Chemistry Laboratory, Department of Applied Sciences, Indian Institute of Information  
Technology Allahabad, Prayagraj, U.P. India-211015

\*Correspondence should be addressed to [nidhimishra@iiita.ac.in](mailto:nidhimishra@iiita.ac.in)

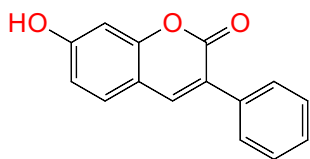

title: 4

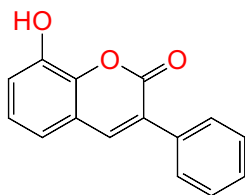

title: 5

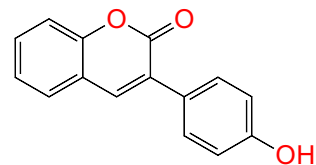

title: 6

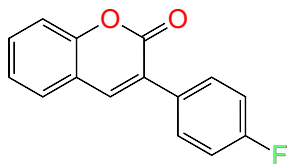

title: 7

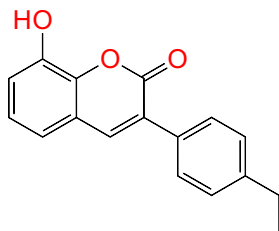

title: 8

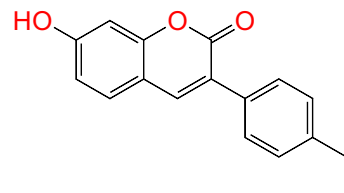

title: 9

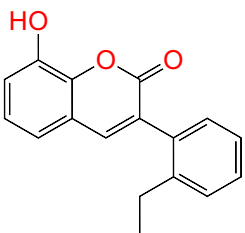

title: 10\_

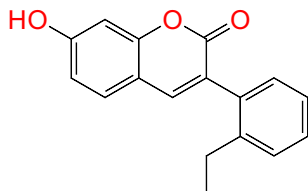

title: 11

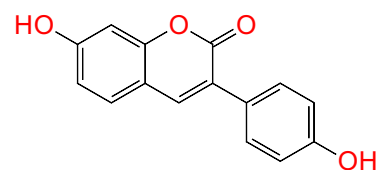

title: 12

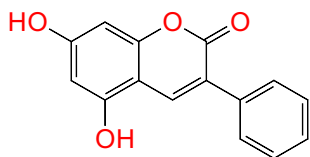

title: 13

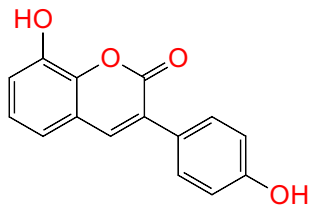

title: 14

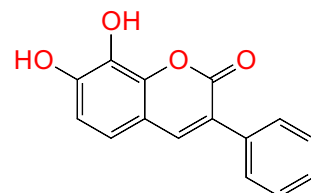

title: 15

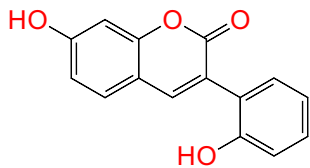

title: 16

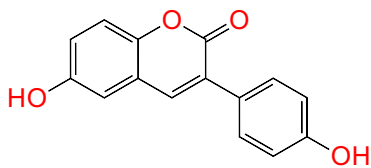

title: 17

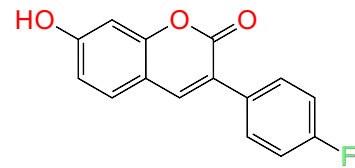

title: 18

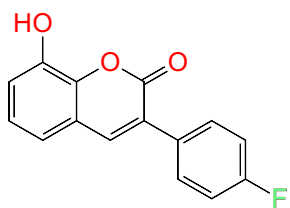

title: 19

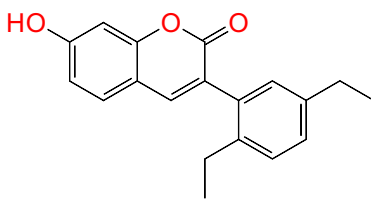

title: 20

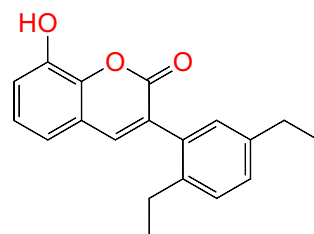

title: 21

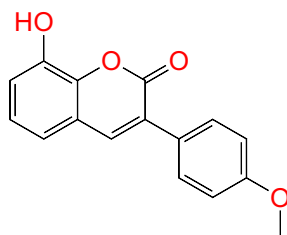

title: 22

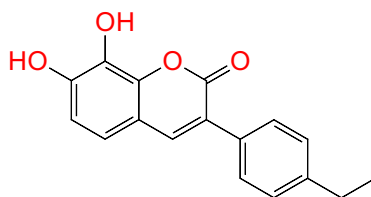

title: 23

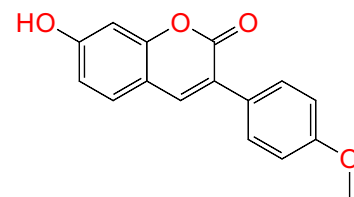

title: 24

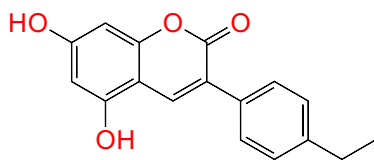

title: 25

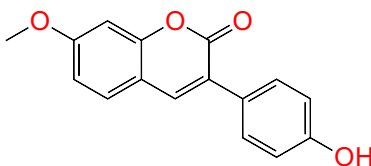

title: 26

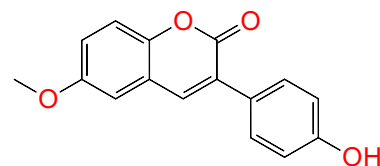

title: 27

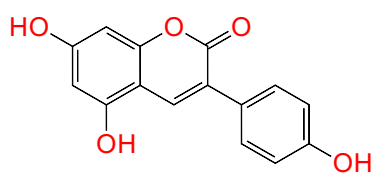

title: 28

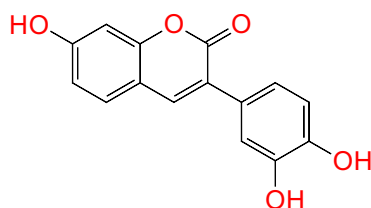

title: 29

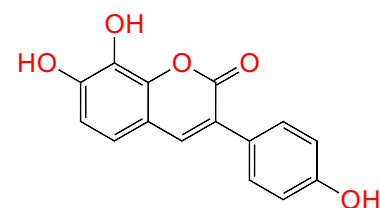

title: 30

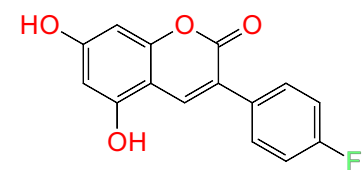

title: 31

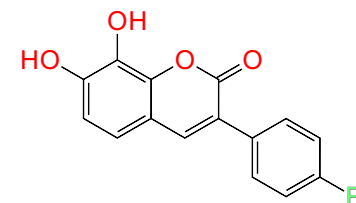

title: 32

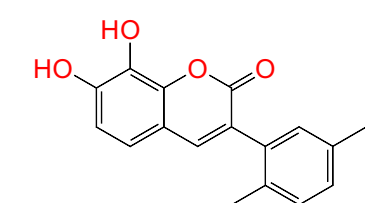

title: 33

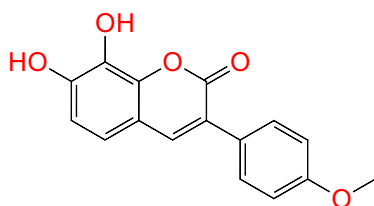

title: 34

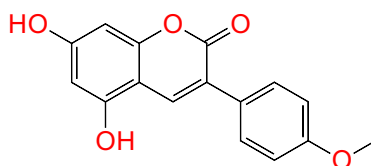

title: 35

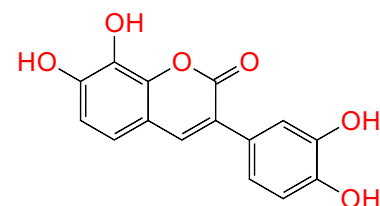

title: 36

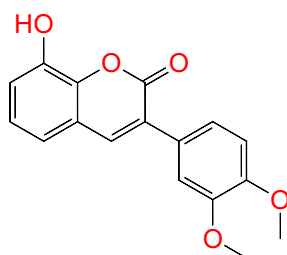

title: 38

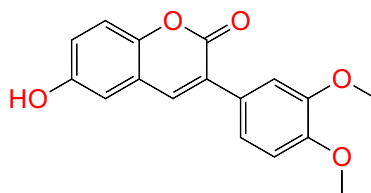

title: 39

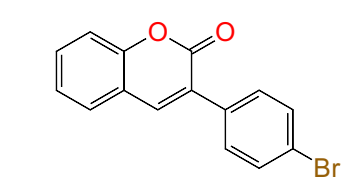

title: 40

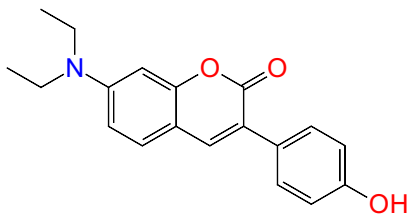

title: 41

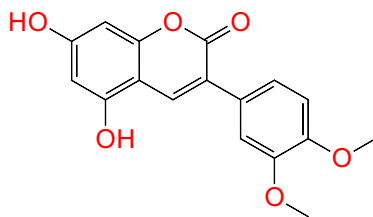

title: 42

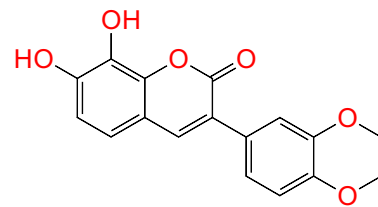

title: 43

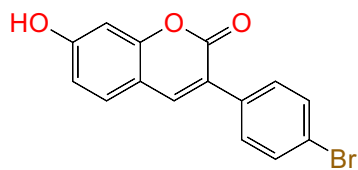

title: 44

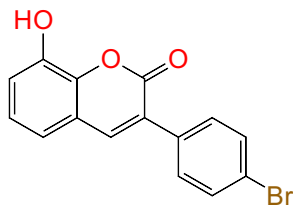

title: 45

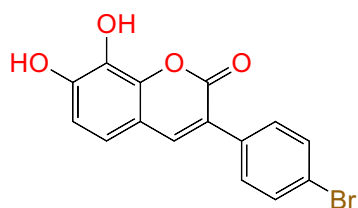

title: 47

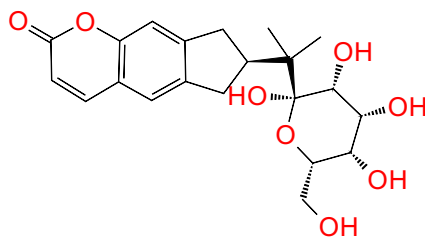

title: Nodakenin

title: 46

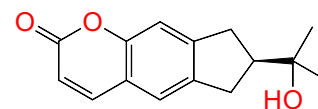

title: Nodakenetin

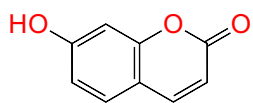

title: Umbelliferone

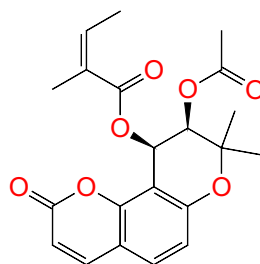

title: angeloylkhellactone

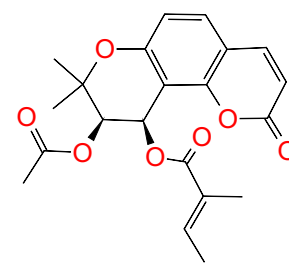

title: 3'R-oAcetul-4'S-tigloylkhellactone

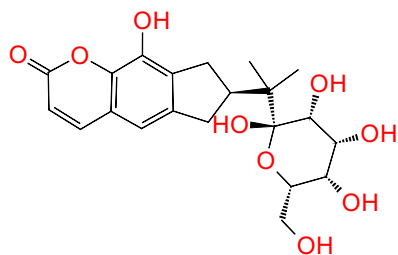

title: Isorutarine

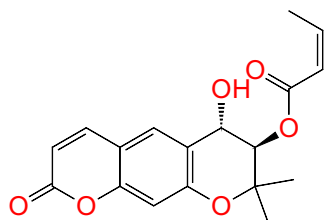

title: 4-hydroxyPd-C-III

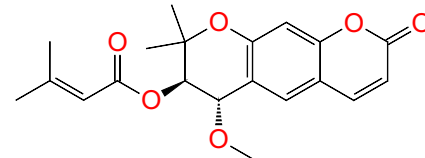

title: 4'-methoxy Pd-C I

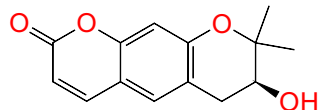

title: Decursinol

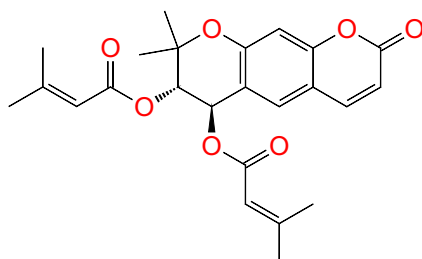

title: Decursidin

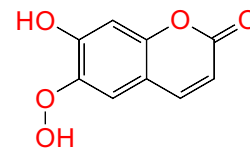

title: Umbelliferon 6-carboxylic acid

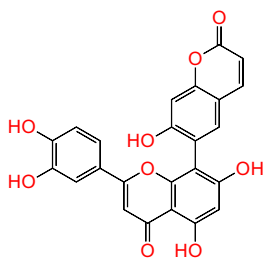

title: 22'-Isopropyl psoralene

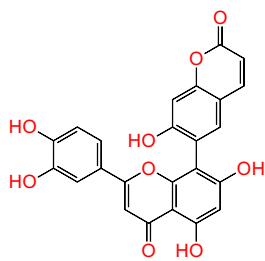

title: 1

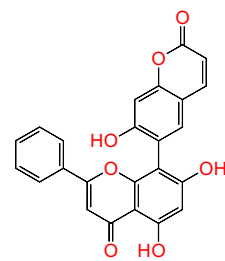

title: 4a

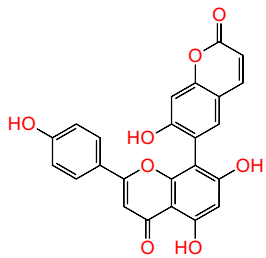

title: 4b

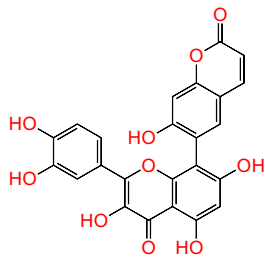

title: 4c

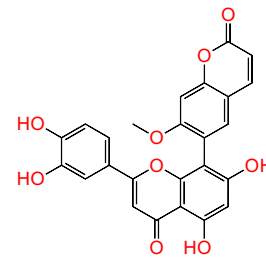

title: 5a

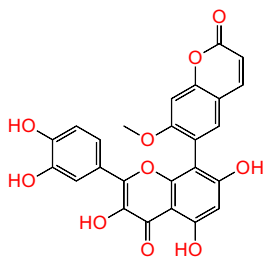

title: 5b

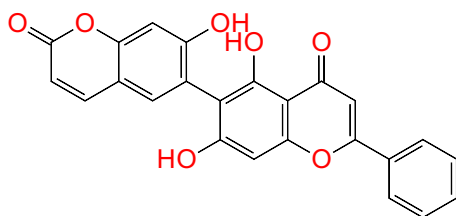

title: 9a

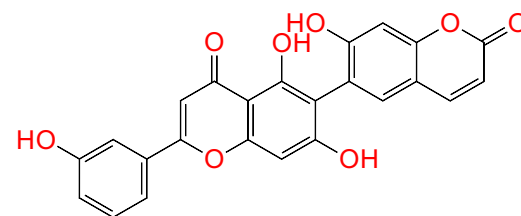

title: 9b

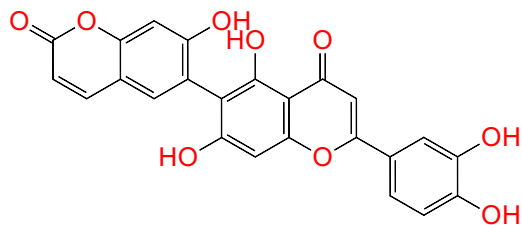

title: 9c

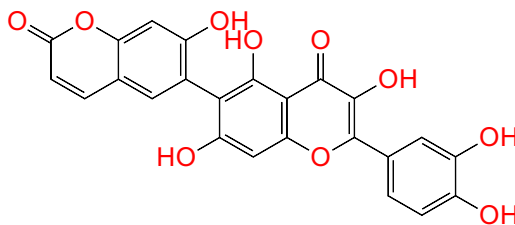

title: 9d

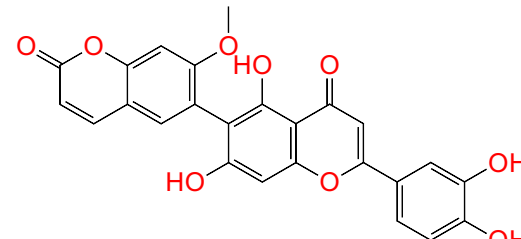

title: 10a

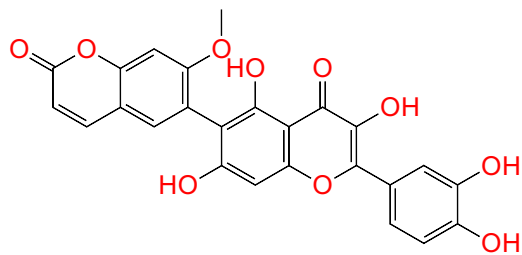

title: 10b

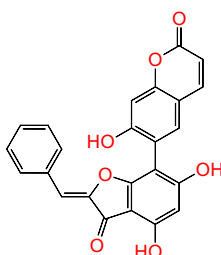

title: 13a

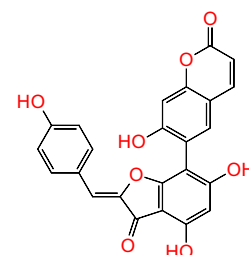

title: 13b

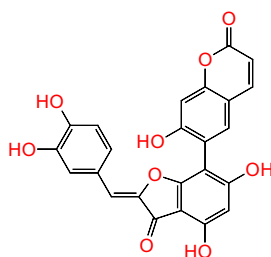

title: 13c

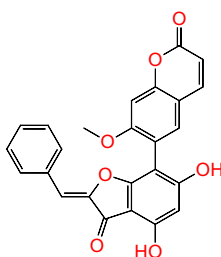

title: 14a

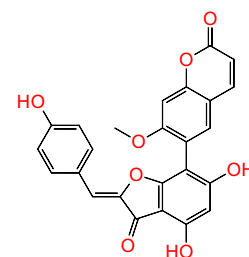

title: 14b

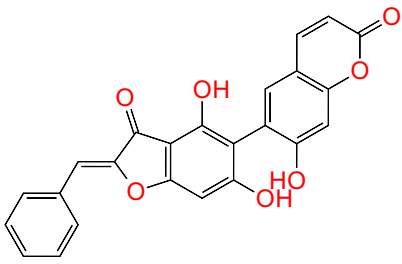

title: 17a

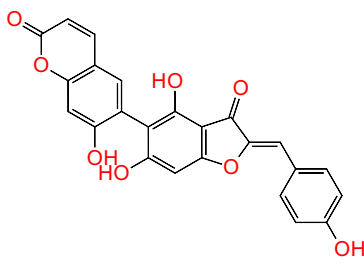

title: 17b

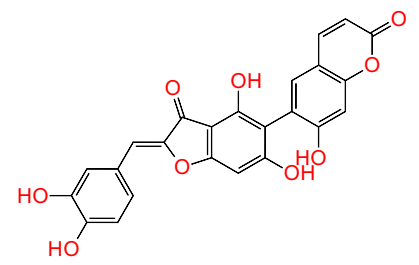

title: 17c

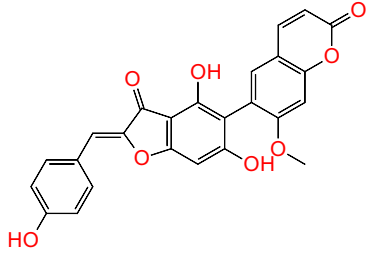

title: 18a

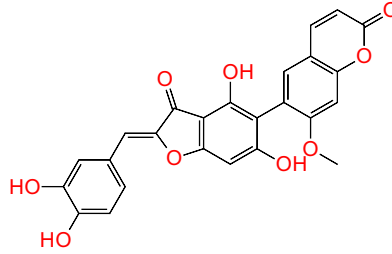

title: 18b

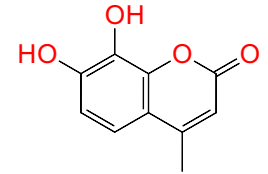

title: 1\_

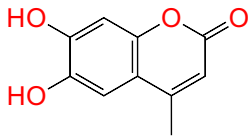

title: 2\_

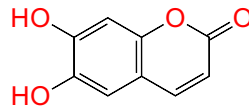

title: 3\_

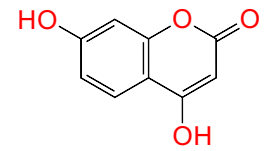

title: 4\_

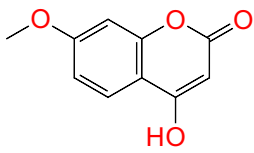

title: 4'

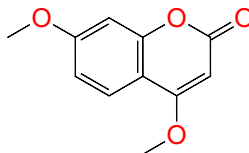

title: 4''

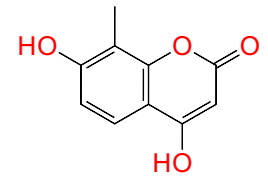

title: 5\_

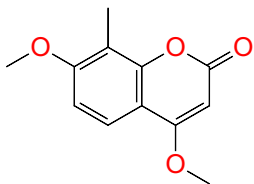

title: 5'

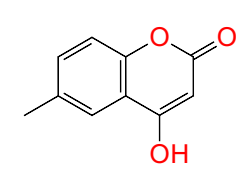

title: 6\_

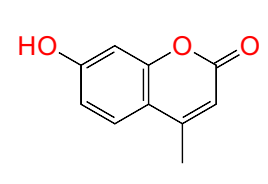

title: 7\_

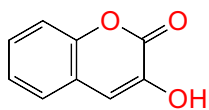

title: 8\_

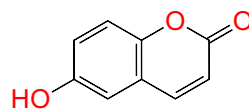

title: 9\_

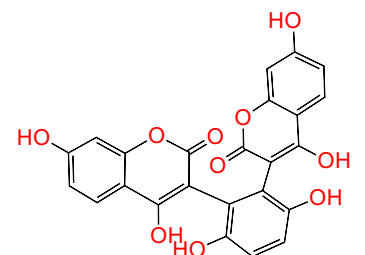

title: 10\_

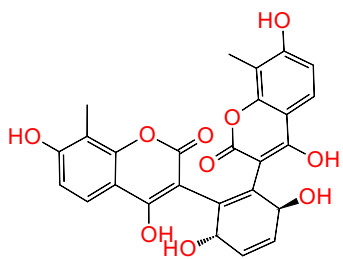

title: 11\_

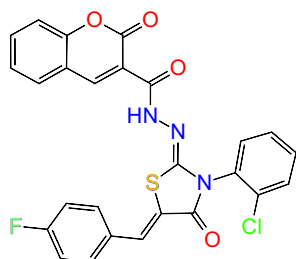

title: 6a

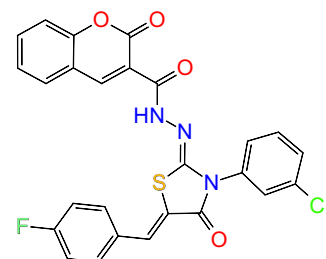

title: 6b

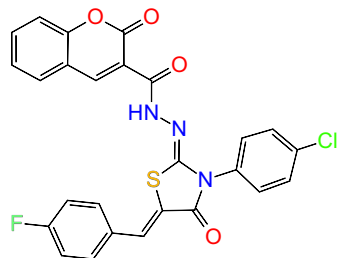

title: 6c

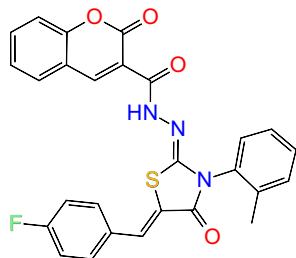

title: 6d

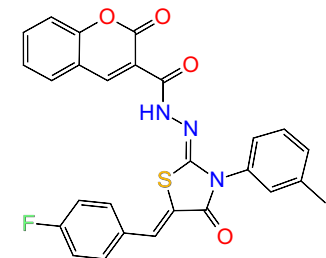

title: 6e

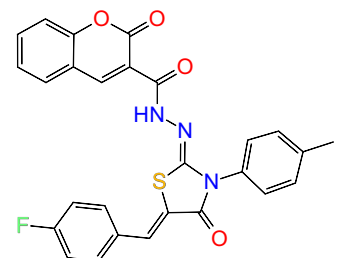

title: 6f

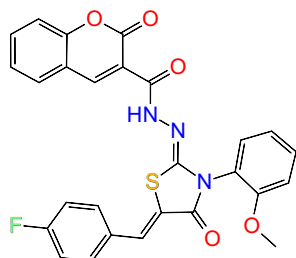

title: 6g

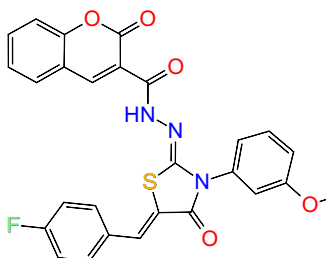

title: 6h

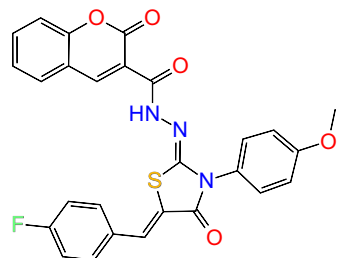

title: 6i

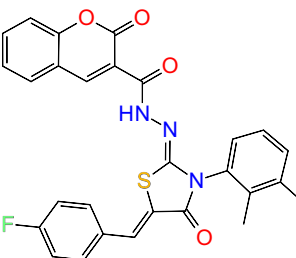

title: 6j

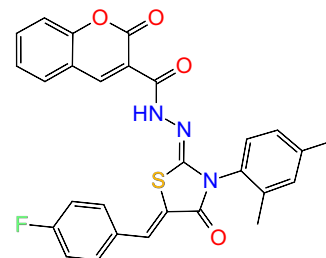

title: 6k

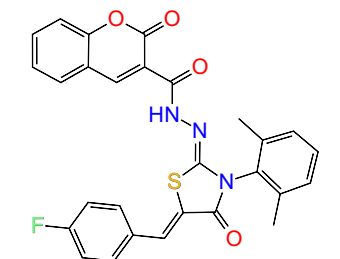

title: 6l

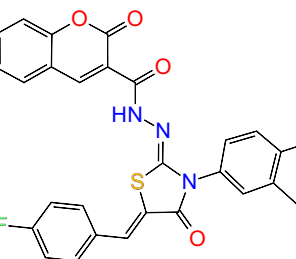

title: 6m

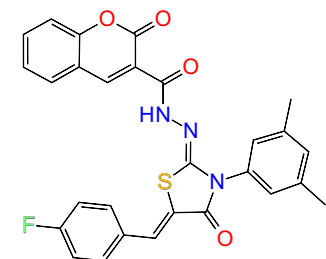

title: 6n

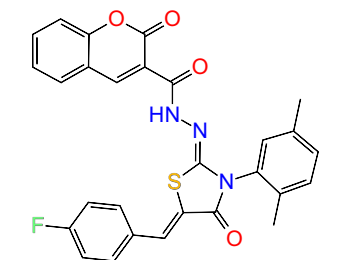

title: 6o

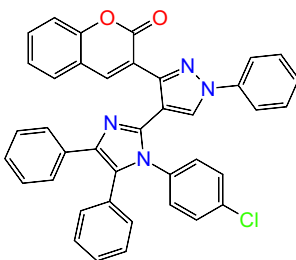

title: 3a

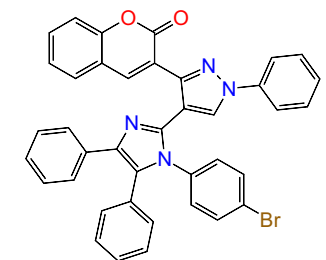

title: 3b

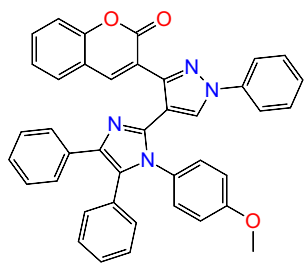

title: 3c

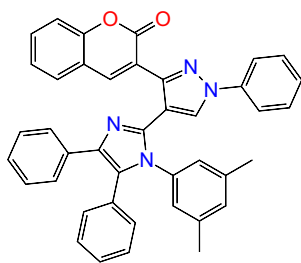

title: 3d

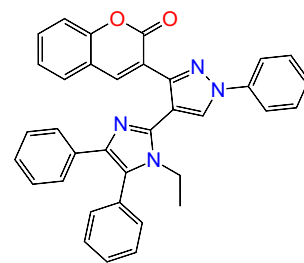

title: 3e

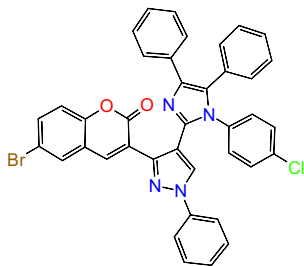

title: 3f

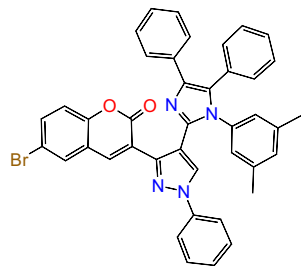

title: 3g

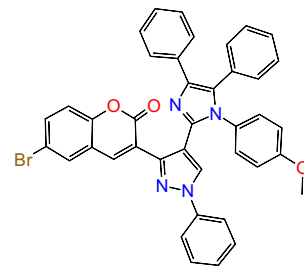

title: 3h

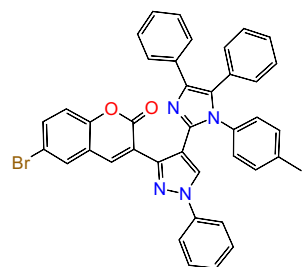

title: 3i

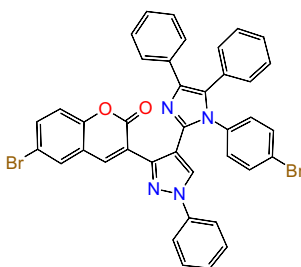

title: 3j

**Figure S1: Structure of 116 coumarin derivatives with ligand IDs used in the study**





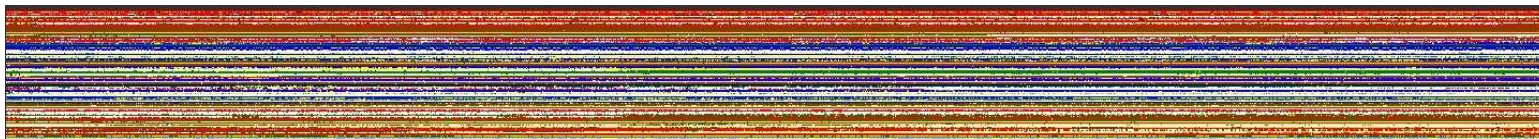

A

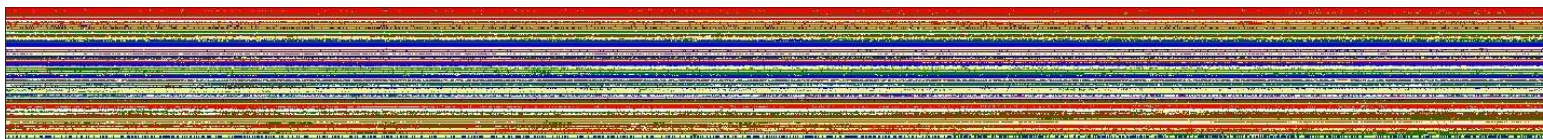

B

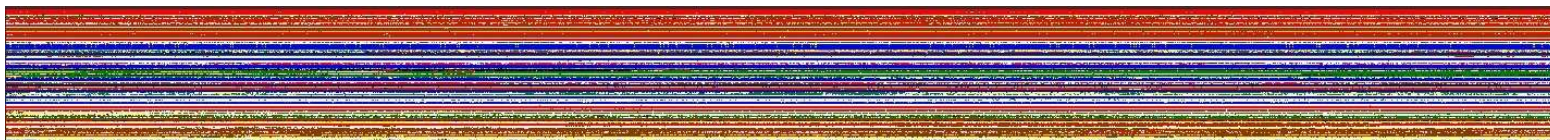

C

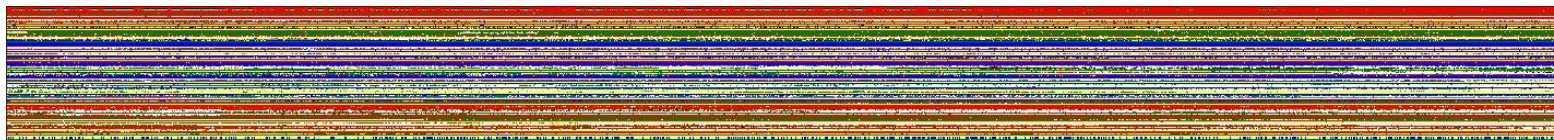

D

**Figure S3:** The secondary structure timeline evolution using DSSP. (A) unligated protein (B) Isorutarine ligated protein(C) Protein ligated with compound 10\_ (D) Protein ligated with compound 36.



**Table S1:** Docking of coumarin derivative with Lysosomal  $\alpha$ -glucosidase and ADME/T properties of ligands

| S.N. | PSA    | Ligand Title         | logS  | logKhsa | SASA   | logB B | FISA   | IC50   | Caco   | PISA   | FOSA   | dipole | %Hum anOral Absorp | HERG  | logP o/w | acceptH B | logK p | MW      | do no rH B | dockin g_scor e |
|------|--------|----------------------|-------|---------|--------|--------|--------|--------|--------|--------|--------|--------|--------------------|-------|----------|-----------|--------|---------|------------|-----------------|
| 1    | 161.70 | Isorutarine          | -2.90 | -0.61   | 645.00 | -2.64  | 282.35 | 250    | 20.81  | 137.92 | 224.71 | 3.21   | 36.23              | -4.76 | -0.23    | 11.55     | -5.37  | 422.43  | 6          | -7.64           |
| 2    | 59.82  | 10                   | -4.02 | 0.25    | 515.22 | -0.58  | 106.98 | 1000   | 957.89 | 305.25 | 102.97 | 7.16   | 100                | -5.25 | 3.02     | 3.25      | -2.12  | 266.29  | 1          | -7.12           |
| 3    | 126.44 | 36                   | -2.72 | -0.41   | 509.37 | -2.14  | 260.89 | 247.34 | 33.25  | 248.48 | 0      | 9.30   | 56.42              | -5.15 | 0.38     | 5.5       | -4.97  | 286.24  | 4          | -6.86           |
| 4    | 60.96  | 8                    | -4.41 | 0.31    | 537.41 | -0.68  | 112.55 | 69.6   | 848.29 | 294.60 | 130.21 | 6.83   | 100                | -5.54 | 3.11     | 3.25      | -2.26  | 266.29  | 1          | -6.84           |
| 5    | 60.97  | 19                   | -3.83 | 0.08    | 484.07 | -0.45  | 112.57 | 1000   | 847.87 | 324.49 | 0      | 8.46   | 95.12              | -5.35 | 2.69     | 3.25      | -2.25  | 256.23  | 1          | -6.80           |
| 6    | 82.38  | 15                   | -3.20 | -0.11   | 486.15 | -1.05  | 159.31 | 29.05  | 305.61 | 326.84 | 0      | 8.5    | 81.84              | -5.37 | 1.78     | 4         | -3.01  | 254.24  | 2          | -6.71           |
| 7    | 166.49 | 5a                   | -5.05 | 0.27    | 693.51 | -2.73  | 295.96 | 1.47   | 15.46  | 308.34 | 89.28  | 5.03   | 60.58              | -5.91 | 2.10     | 7.75      | -5.31  | 460.39  | 3          | -6.68           |
| 8    | 179.38 | 2'Isopropylpsoralene | -4.57 | 0.06    | 669.01 | -3.21  | 344.40 | 85.82  | 5.36   | 324.60 | 0      | 4.76   | 47.19              | -5.99 | 1.22     | 7.75      | -6.14  | 446.36  | 4          | -6.64           |
| 9    | 179.09 | 1                    | -4.86 | 0.14    | 687.89 | -3.18  | 335.71 | 8.32   | 6.49   | 352.18 | 0      | 4.73   | 50.44              | -6.22 | 1.53     | 7.75      | -5.89  | 446.36  | 4          | -6.64           |
| 10   | 69.30  | 22                   | -3.63 | 0.05    | 507.32 | -0.63  | 112.05 | 1000   | 857.68 | 302.59 | 92.67  | 7.18   | 94.32              | -5.28 | 2.54     | 4         | -2.23  | 268.26  | 1          | -6.52           |
| 11   | 185.42 | 5b                   | -4.80 | 0.10    | 705.84 | -3.22  | 334.34 | 3.38   | 6.68   | 288.50 | 82.99  | 7.52   | 50.43              | -5.92 | 1.48     | 8.5       | -5.99  | 476.39  | 4          | -6.50           |
| 12   | 60.97  | 45                   | -4.41 | 0.18    | 504.15 | -0.40  | 112.57 | 1000   | 847.97 | 314.21 | 0      | 8.18   | 100                | -5.45 | 3.02     | 3.25      | -2.29  | 317.13  | 1          | -6.47           |
| 13   | 99.14  | 4-hydroxyPd-C-III    | -4.14 | -0.03   | 593.51 | -0.84  | 128.21 | 77.3   | 602.67 | 188.68 | 276.61 | 10.91  | 89.76              | -5.09 | 2.23     | 6.95      | -2.93  | 330.33  | 1          | -6.45           |
| 14   | 83.51  | 14                   | -3.22 | -0.11   | 487.40 | -1.13  | 167.22 | 212.72 | 257.10 | 320.18 | 0      | 7.37   | 80.18              | -5.35 | 1.72     | 4         | -3.18  | 254.24  | 2          | -6.43           |
| 15   | 105.67 | 29                   | -2.90 | -0.26   | 494.13 | -1.6   | 213.23 | 29.89  | 94.13  | 280.89 | 0      | 8.14   | 68.40              | -5.13 | 1.04     | 4.75      | -4.07  | 270.24  | 3          | -6.43           |
| 16   | 90.67  | 34                   | -3.44 | -0.08   | 521.22 | -1.14  | 158.70 | 18.8   | 309.65 | 269.84 | 92.66  | 8.56   | 82.59              | -5.24 | 1.89     | 4.75      | -3.11  | 284.26  | 2          | -6.43           |
| 17   | 60.97  | 5                    | -3.47 | 0.04    | 475.23 | -0.56  | 112.57 | 280.38 | 847.84 | 362.65 | 0      | 7.11   | 93.75              | -5.47 | 2.45     | 3.25      | -2.12  | 238.242 | 1          | -6.42           |
| 18   | 81.41  | 33                   | -4.04 | 0.14    | 535.98 | -1.04  | 152.94 | 1000   | 351.15 | 227.82 | 155.21 | 8.39   | 86.24              | -5.11 | 2.34     | 4         | -3.24  | 282.29  | 2          | -6.37           |
| 19   | 197.79 | 9d                   | -4.64 | -0.08   | 702.96 | -3.71  | 367.08 | 3.1    | 3.27   | 335.88 | 0      | 5.42   | 28.08              | -6.42 | 0.83     | 8.5       | -6.43  | 462.36  | 5          | -6.264          |
| 20   | 98.20  | 43                   | -3.74 | -0.06   | 560.54 | -1.25  | 159.32 | 1000   | 305.51 | 215.86 | 185.35 | 8.86   | 83.24              | -5.22 | 2.01     | 5.5       | -3.21  | 314.29  | 2          | -6.12           |
| 21   | 82.84  | 25                   | -3.99 | 0.12    | 542.70 | -1.16  | 158.39 | 11.49  | 311.77 | 254.03 | 130.27 | 8.29   | 85.61              | -5.30 | 2.39     | 4         | -3.16  | 282.29  | 2          | -6.09           |
| 22   | 139.30 | Nodakenin            | -3.05 | -0.48   | 632.29 | -2.09  | 234.45 | 250    | 59.23  | 168.30 | 229.54 | 8.08   | 61.16              | -4.78 | 0.42     | 10.8      | -4.48  | 406.43  | 5          | -6.02           |
| 23   | 82.8   | 16                   | -3.08 | -0.12   | 478.50 | -0.94  | 151.07 | 10.16  | 365.84 | 327.43 | 0      | 7.20   | 83.45              | -5.20 | 1.81     | 4         | -2.86  | 254.24  | 2          | -5.97           |
| 24   | 104.91 | 30                   | -2.96 | -0.26   | 498.38 | -1.63  | 213.95 | 19.04  | 92.67  | 284.43 | 0      | 8.71   | 68.30              | -5.25 | 1.05     | 4.75      | -4.07  | 270.24  | 3          | -5.90           |
| 25   | 179.14 | 9c                   | -4.95 | 0.08    | 693.73 | -3.3   | 335.35 | 1.71   | 6.54   | 358.37 | 0      | 6.59   | 49.84              | -6.49 | 1.41     | 7.75      | -5.86  | 446.36  | 4          | -5.83           |
| 26   | 199.45 | 4c                   | -4.15 | -0.06   | 670.51 | -3.46  | 372.31 | 4.43   | 2.91   | 298.20 | 0      | 5.2    | 26.60              | -5.71 | 0.73     | 8.5       | -6.65  | 462.36  | 5          | -5.82           |
| 27   | 61.60  | 18                   | -3.76 | 0.08    | 479.80 | -0.43  | 111.64 | 86.91  | 865.37 | 321.16 | 0      | 8.45   | 95.25              | -5.23 | 2.68     | 3.25      | -2.25  | 256.23  | 1          | -5.76           |
| 28   | 148.9  | 14b                  | -5.43 | 0.39    | 708.39 | -2.60  | 266.29 | 11.83  | 29.55  | 339.96 | 102.12 | 5.71   | 69.70              | -6.31 | 2.80     | 7         | -4.55  | 444.39  | 2          | -5.74           |
| 29   | 76.79  | 38                   | -3.95 | 0.06    | 549.6  | -0.74  | 112.58 | 20.23  | 847.68 | 251.64 | 185.37 | 7.57   | 94.83              | -5.35 | 2.64     | 4.75      | -2.32  | 298.29  | 1          | -5.67           |
| 30   | 82.37  | 23                   | -4.09 | 0.12    | 548.34 | -1.20  | 159.28 | 25.48  | 305.76 | 258.79 | 130.26 | 8.25   | 85.55              | -5.44 | 2.41     | 4         | -3.15  | 282.29  | 2          | -5.61           |
| 31   | 84.14  | 17                   | -3.15 | -0.11   | 483.11 | -1.10  | 166.30 | 11.54  | 262.32 | 316.81 | 0      | 5.75   | 80.32              | -5.23 | 1.72     | 4         | -3.18  | 254.24  | 2          | -5.58           |
| 32   | 84.14  | 12                   | -3.16 | -0.11   | 483.32 | -1.10  | 166.29 | 19.39  | 262.38 | 317.03 | 0      | 7.66   | 80.33              | -5.24 | 1.72     | 4         | -3.17  | 254.24  | 2          | -5.57           |
| 33   | 60.45  | 11                   | -3.96 | 0.25    | 512.11 | -0.56  | 106.14 | 16.39  | 975.75 | 302.51 | 103.45 | 7.49   | 100                | -5.16 | 3.03     | 3.25      | -2.12  | 266.29  | 1          | -5.54           |
| 34   | 82.37  | 32                   | -3.56 | -0.07   | 495.06 | -0.95  | 159.30 | 1000   | 305.64 | 288.75 | 0      | 9.64   | 83.19              | -5.25 | 2.01     | 4         | -3.15  | 272.23  | 2          | -5.52           |
| 35   | 91.14  | 35                   | -3.37 | -0.08   | 517.14 | -1.12  | 158.46 | 10.81  | 311.30 | 266.00 | 92.67  | 8.62   | 82.58              | -5.13 | 1.88     | 4.75      | -3.11  | 284.26  | 2          | -5.52           |
| 36   | 98.67  | 42                   | -3.65 | -0.06   | 555.04 | -1.22  | 158.42 | 39.08  | 311.58 | 211.27 | 185.34 | 9.00   | 83.30              | -5.09 | 2.00     | 5.5       | -3.21  | 314.29  | 2          | -5.50           |
| 37   | 105.38 | 28                   | -2.88 | -0.26   | 492.88 | -1.59  | 213.06 | 1.37   | 94.50  | 279.82 | 0      | 8.77   | 68.39              | -5.11 | 1.04     | 4.75      | -4.07  | 270.24  | 3          | -5.50           |

|    |        |                                                    |        |       |        |       |        |        |         |        |        |       |       |       |       |      |       |        |   |       |
|----|--------|----------------------------------------------------|--------|-------|--------|-------|--------|--------|---------|--------|--------|-------|-------|-------|-------|------|-------|--------|---|-------|
| 38 | 69.93  | 26                                                 | -3.64  | 0.06  | 507.70 | -0.62 | 111.80 | 1000   | 862.22  | 303.21 | 92.68  | 7.75  | 94.47 | -5.26 | 2.56  | 4    | -2.22 | 268.26 | 1 | -5.47 |
| 39 | 122.41 | 6h                                                 | -7.44  | 0.73  | 829.63 | -1.48 | 159.29 | 0.51   | 305.68  | 499.91 | 105.81 | 12.14 | 75.87 | -7.81 | 5.18  | 7.25 | -2.11 | 515.51 | 0 | -5.46 |
| 40 | 61.60  | 9                                                  | -4.33  | 0.30  | 533.16 | -0.66 | 111.65 | 118.29 | 865.18  | 291.23 | 130.27 | 7.25  | 100   | -5.44 | 3.11  | 3.25 | -2.26 | 266.29 | 1 | -5.42 |
| 41 | 63.47  | 41                                                 | -4.79  | 0.38  | 596.78 | -0.81 | 110.79 | 13.43  | 881.61  | 270.62 | 215.37 | 5.86  | 100   | -5.61 | 3.52  | 4.25 | -2.12 | 309.36 | 1 | -5.41 |
| 42 | 82.38  | 47                                                 | -3.99  | 0.008 | 513.28 | -0.90 | 159.30 | 35.71  | 305.61  | 276.60 | 0      | 9.41  | 85.02 | -5.31 | 2.32  | 4    | -3.19 | 333.13 | 2 | -5.36 |
| 43 | 82.84  | 46                                                 | -3.90  | 0.004 | 507.99 | -0.87 | 158.40 | 1000   | 311.69  | 272.21 | 0      | 9.58  | 85.10 | -5.17 | 2.31  | 4    | -3.19 | 333.13 | 2 | -5.35 |
| 44 | 84.55  | 2                                                  | -1.70  | -0.48 | 381.3  | -0.94 | 173.24 | 94.25  | 225.43  | 129.09 | 78.96  | 5.39  | 71.08 | -3.54 | 0.34  | 4    | -4.06 | 192.17 | 2 | -5.34 |
| 45 | 60.39  | 20                                                 | -4.88  | 0.52  | 572.87 | -0.67 | 105.83 | 1000   | 982.45  | 233.90 | 233.13 | 7.42  | 100   | -5.23 | 3.68  | 3.25 | -2.26 | 294.34 | 1 | -5.30 |
| 46 | 82.84  | 31                                                 | -3.46  | -0.08 | 489.53 | -0.92 | 158.40 | 19.08  | 311.68  | 284.11 | 0      | 9.81  | 83.26 | -5.11 | 1.99  | 4    | -3.15 | 272.23 | 2 | -5.27 |
| 47 | 59.73  | 21                                                 | -4.92  | 0.52  | 575.16 | -0.68 | 105.98 | 1000   | 979.22  | 236.22 | 232.96 | 7.06  | 100   | -5.3  | 3.68  | 3.25 | -2.25 | 294.34 | 1 | -5.19 |
| 48 | 69.91  | 27                                                 | -3.63  | 0.06  | 507.51 | -0.62 | 111.74 | 70.26  | 863.48  | 303.07 | 92.693 | 6.16  | 94.48 | -5.26 | 2.55  | 4    | -2.22 | 268.26 | 1 | -5.19 |
| 49 | 39.06  | 7                                                  | -3.81  | 0.15  | 467.59 | 0.11  | 57.01  | 1000   | 2852.83 | 363.57 | 0      | 7.19  | 100   | -5.34 | 3.46  | 2.5  | -1.19 | 240.23 | 0 | -5.17 |
| 50 | 61.60  | 4                                                  | -3.36  | 0.04  | 468.89 | -0.53 | 111.64 | 2567   | 865.34  | 357.25 | 0      | 7.46  | 93.85 | -5.28 | 2.44  | 3.25 | -2.12 | 238.24 | 1 | -5.16 |
| 51 | 166.11 | 10a                                                | -5.64  | 0.29  | 729.81 | -2.97 | 295.58 | 4.61   | 15.59   | 342.38 | 91.84  | 8.03  | 61.40 | -6.60 | 2.23  | 7.75 | -5.18 | 460.39 | 3 | -5.11 |
| 52 | 99.29  | Umbelliferon 6-carboxylic acid                     | -1.19  | -0.75 | 375.25 | -1.22 | 199.15 | 172.1  | 128.02  | 176.09 | 0      | 2.80  | 62.13 | -3.83 | -0.43 | 5.7  | -4.28 | 194.14 | 2 | -5.07 |
| 53 | 77.43  | 39                                                 | -3.88  | 0.06  | 545.33 | -0.72 | 111.69 | 13.09  | 864.39  | 248.27 | 185.36 | 6.02  | 94.95 | -5.24 | 2.63  | 4.75 | -2.31 | 298.29 | 1 | -5.07 |
| 54 | 82.84  | 13                                                 | -3.11  | -0.11 | 480.5  | -1.02 | 158.41 | 13.46  | 311.63  | 322.08 | 0      | 8.55  | 81.91 | -5.22 | 1.76  | 4    | -3.01 | 254.24 | 2 | -4.99 |
| 55 | 69.91  | 24                                                 | -3.56  | 0.05  | 503.17 | -0.61 | 111.10 | 27.42  | 875.54  | 299.38 | 92.67  | 7.55  | 94.46 | -5.16 | 2.53  | 4    | -2.22 | 268.26 | 1 | -4.90 |
| 56 | 185.28 | 10b                                                | -5.32  | 0.11  | 739.31 | -3.40 | 327.77 | 2.11   | 7.72    | 319.71 | 91.83  | 5.59  | 52.50 | -6.54 | 1.65  | 8.5  | -5.76 | 476.39 | 4 | -4.86 |
| 57 | 181.79 | 17c                                                | -4.81  | 0.01  | 705.49 | -3.51 | 337.91 | 4.17   | 6.18    | 354.77 | 12.8   | 7.59  | 49.66 | -6.60 | 1.46  | 7.75 | -5.72 | 446.36 | 4 | -4.82 |
| 58 | 112.92 | 6b                                                 | -8.02  | 0.88  | 814.17 | -1.22 | 158.01 | 100    | 314.36  | 506.92 | 13.38  | 12.67 | 78.64 | -7.80 | 5.62  | 6.5  | -2.16 | 519.93 | 0 | -4.76 |
| 59 | 168.65 | 18b                                                | -5.44  | 0.22  | 737.50 | -3.15 | 297.43 | 9.35   | 14.97   | 336.22 | 103.85 | 7.65  | 61.25 | -6.65 | 2.26  | 7.75 | -5.04 | 460.39 | 3 | -4.60 |
| 60 | 112.92 | 6e                                                 | -7.84  | 0.92  | 821.51 | -1.39 | 157.48 | 0.59   | 318.01  | 498.16 | 101.46 | 10.84 | 90.63 | -7.78 | 5.44  | 6.5  | -2.18 | 499.51 | 0 | -4.58 |
| 61 | 147.34 | 18a                                                | -5.77  | 0.39  | 728.66 | -2.58 | 251.43 | 13.65  | 40.88   | 373.27 | 103.95 | 9.33  | 73.14 | -6.80 | 2.96  | 7    | -4.16 | 444.39 | 2 | -4.56 |
| 62 | 84.64  | 3                                                  | -1.35  | -0.59 | 357.59 | -0.93 | 174.03 | 0      | 221.56  | 183.55 | 0      | 4.93  | 69.60 | -3.71 | 0.11  | 4    | -3.88 | 178.14 | 2 | -4.52 |
| 63 | 39.06  | 40                                                 | -4.32  | 0.25  | 487.45 | 0.18  | 57.00  | 1000   | 2853.14 | 353.07 | 0      | 6.93  | 100   | -5.44 | 3.64  | 2.5  | -1.23 | 301.13 | 0 | -4.47 |
| 64 | 61.60  | 6                                                  | -3.40  | 0.04  | 470.92 | -0.54 | 111.67 | 60.88  | 864.76  | 359.24 | 0      | 6.25  | 93.88 | -5.34 | 2.45  | 3.25 | -2.12 | 238.24 | 1 | -4.35 |
| 65 | 107.50 | 3'R-<br>oAcetyl-<br>4'S-<br>tigloylkh<br>ellactone | -4.15  | 0.02  | 645.03 | -0.55 | 100.35 | 93.39  | 1107.14 | 168.80 | 375.87 | 7.94  | 100   | -4.83 | 3.08  | 7.25 | -2.48 | 386.40 | 0 | -4.35 |
| 66 | 106.50 | Decursidin                                         | -5.97  | 0.47  | 749.76 | -0.75 | 101.71 | 79.09  | 1074.94 | 174.15 | 473.89 | 9.26  | 100   | -5.69 | 4.17  | 7.25 | -2.39 | 426.46 | 0 | -4.34 |
| 67 | 61.6   | 44                                                 | -4.34  | 0.17  | 499.88 | -0.38 | 111.63 | 1000   | 865.42  | 310.86 | 0      | 8.24  | 100   | -5.33 | 3.02  | 3.25 | -2.29 | 317.13 | 1 | -4.33 |
| 68 | 68.48  | Decursinol                                         | -2.98  | -0.18 | 467.64 | -0.44 | 110.52 | 65.29  | 886.65  | 166.47 | 190.63 | 9.07  | 89.24 | -4.22 | 1.62  | 4.95 | -2.87 | 246.26 | 1 | -4.31 |
| 69 | 157.66 | 9b                                                 | -5.25  | 0.25  | 683.07 | -2.72 | 288.30 | 6.42   | 18.27   | 394.76 | 0      | 7.28  | 61.88 | -6.61 | 2.11  | 7    | -4.96 | 430.37 | 3 | -4.25 |
| 70 | 157.26 | 4b                                                 | -4.91  | 0.23  | 662.33 | -2.70 | 300.01 | 14.37  | 14.15   | 362.32 | 0      | 3.63  | 58.85 | -6.14 | 1.93  | 7    | -5.29 | 430.37 | 3 | -4.22 |
| 71 | 193.36 | 10                                                 | -3.28  | -0.36 | 651.57 | -2.82 | 301.35 | 0.86   | 13.74   | 350.21 | 0      | 3.08  | 38.13 | -5.77 | 0.64  | 9.5  | -4.97 | 462.36 | 6 | -4.19 |
| 72 | 65.95  | 3g                                                 | -12.76 | 2.86  | 993.43 | -0.01 | 65.69  | 5.64   | 2360.2  | 687.09 | 163.26 | 9.84  | 100   | -8.80 | 10.06 | 5    | -0.31 | 689.61 | 0 | -4.10 |
| 73 | 63.03  | 7                                                  | -1.84  | -0.38 | 370.30 | -0.49 | 126.36 | 56.2   | 627.46  | 164.98 | 78.95  | 8.10  | 82.69 | -3.63 | 0.97  | 3.25 | -3.17 | 176.17 | 1 | -4.10 |
| 74 | 59.75  | Nodakenetin                                        | -3.64  | 0.16  | 484.64 | -0.46 | 104.97 | 720.29 | 1000.94 | 168.97 | 210.69 | 8.87  | 95.59 | -4.33 | 2.55  | 3.25 | -2.66 | 244.29 | 1 | -4.08 |

|     |        |                    |        |       |        |        |        |        |         |        |        |       |       |       |      |      |       |        |   |       |
|-----|--------|--------------------|--------|-------|--------|--------|--------|--------|---------|--------|--------|-------|-------|-------|------|------|-------|--------|---|-------|
| 75  | 182.13 | 13c                | -4.95  | 0.1   | 714.14 | -3.52  | 341.95 | 17.98  | 5.66    | 359.13 | 13.05  | 7.16  | 50.00 | -6.56 | 1.63 | 7.75 | -5.78 | 446.36 | 4 | -4.05 |
| 76  | 61.79  | 8                  | -1.43  | -0.51 | 345.15 | -0.42  | 119.64 | 35.3   | 726.69  | 225.51 | 0      | 4.59  | 82.68 | -3.80 | 0.77 | 3.25 | -2.83 | 162.14 | 1 | -4.03 |
| 77  | 63.11  | 9                  | -1.45  | -0.50 | 346.42 | -0.48  | 127.09 | 0      | 617.48  | 219.32 | 0      | 5.83  | 81.12 | -3.79 | 0.72 | 3.25 | -2.99 | 162.14 | 1 | -4.02 |
| 78  | 126.32 | 14a                | -5.66  | 0.54  | 696.49 | -1.95  | 211.99 | 3.55   | 96.73   | 382.51 | 101.99 | 5.57  | 83.15 | -6.45 | 3.53 | 6.25 | -3.50 | 428.39 | 1 | -4.02 |
| 79  | 135.03 | 9a                 | -5.50  | 0.41  | 670.03 | -2.06  | 233.71 | 22.73  | 60.20   | 436.32 | 0      | 8.51  | 75.46 | -6.73 | 2.84 | 6.25 | -3.90 | 414.37 | 2 | -3.99 |
| 80  | 63.11  | Umbelliferone      | -1.45  | -0.50 | 346.31 | -0.48  | 127.07 | 629.87 | 617.78  | 219.23 | 0      | 7.69  | 81.12 | -3.79 | 0.72 | 3.25 | -2.99 | 162.14 | 1 | -3.94 |
| 81  | 53.25  | 5'                 | -2.41  | -0.37 | 454.59 | -0.17  | 70.92  | 0      | 2105.15 | 114.41 | 269.24 | 7.04  | 96.87 | -4.12 | 1.78 | 4    | -2.23 | 220.22 | 0 | -3.89 |
| 82  | 65.74  | 3i                 | -11.99 | 2.67  | 952.72 | -0.006 | 67.008 | 5.83   | 2293.31 | 724.84 | 83.47  | 9.72  | 100   | -8.76 | 9.65 | 5    | -0.20 | 675.58 | 0 | -3.86 |
| 83  | 73.98  | 3c                 | -10.83 | 2.33  | 938.58 | -0.26  | 67.99  | 25.35  | 2244.67 | 780.00 | 90.58  | 9.98  | 100   | -8.99 | 8.83 | 5.75 | 0.07  | 612.68 | 0 | -3.84 |
| 84  | 60.53  | 6                  | -1.88  | -0.38 | 372.84 | -0.42  | 116.04 | 0      | 785.99  | 168.69 | 88.10  | 6.9   | 84.94 | -3.72 | 1.05 | 3.25 | -2.96 | 176.17 | 1 | -3.77 |
| 85  | 68.84  | 4'                 | -1.63  | -0.5  | 378.04 | -0.47  | 116.08 | 96.1   | 785.36  | 169.25 | 92.70  | 7.93  | 83.87 | -3.67 | 0.87 | 4    | -2.87 | 192.17 | 1 | -3.73 |
| 86  | 83.08  | 4                  | -1.28  | -0.60 | 353.06 | -0.88  | 170.73 | 38.85  | 238.14  | 182.33 | 0      | 7.96  | 70.12 | -3.61 | 0.10 | 4    | -3.83 | 178.14 | 2 | -3.70 |
| 87  | 112.34 | 6o                 | -8.27  | 1.07  | 844.29 | -1.33  | 150.54 | 100    | 370.03  | 463.01 | 166.43 | 10.94 | 80.78 | -7.68 | 5.77 | 6.5  | -2.18 | 513.54 | 0 | -3.67 |
| 88  | 112.37 | 6d                 | -7.66  | 0.89  | 812.02 | -1.29  | 150.54 | 1.62   | 370.08  | 519.10 | 78.09  | 11.18 | 91.82 | -7.80 | 5.44 | 6.5  | -1.98 | 499.51 | 0 | -3.67 |
| 89  | 65.79  | 3j                 | -12.31 | 2.65  | 952.54 | 0.176  | 67.12  | 5.21   | 2287.30 | 731.98 | 0      | 7.83  | 100   | -8.82 | 9.90 | 5    | -0.17 | 740.45 | 0 | -3.67 |
| 90  | 65.74  | 3b                 | -11.43 | 2.49  | 923.70 | 0.004  | 67.02  | 34.35  | 2292.29 | 780.58 | 0      | 8.50  | 100   | -8.91 | 9.32 | 5    | -0.00 | 661.55 | 0 | -3.63 |
| 91  | 83.72  | l                  | -1.77  | -0.49 | 386.27 | -0.97  | 173.95 | 52.7   | 221.96  | 133.41 | 78.90  | 9.16  | 70.99 | -3.72 | 0.35 | 4    | -4.06 | 192.17 | 2 | -3.60 |
| 92  | 160.51 | 17b                | -5.10  | 0.18  | 693.85 | -2.93  | 291.23 | 11.62  | 17.14   | 390.18 | 12.43  | 9.32  | 61.62 | -6.71 | 2.15 | 7    | -4.84 | 430.37 | 3 | -3.56 |
| 93  | 135.46 | 4a                 | -5.10  | 0.38  | 646.57 | -2.04  | 242.97 | 11.57  | 49.17   | 403.59 | 0      | 2.96  | 72.73 | -6.23 | 2.64 | 6.25 | -4.19 | 414.37 | 2 | -3.56 |
| 94  | 65.79  | 3f                 | -12.20 | 2.62  | 947.67 | 0.16   | 67.13  | 2.53   | 2286.97 | 732.75 | 0      | 7.46  | 100   | -8.80 | 9.83 | 5    | -0.17 | 696.00 | 0 | -3.54 |
| 95  | 55.80  | 4"                 | -1.63  | -0.58 | 413.80 | -0.15  | 72.27  | 100    | 2044.12 | 155.78 | 185.74 | 7.45  | 94.48 | -3.93 | 1.41 | 4    | -2.11 | 206.19 | 0 | -3.53 |
| 96  | 102.74 | angeloylhellactone | -3.93  | -0.01 | 633.28 | -0.46  | 93.28  | 264.26 | 1291.96 | 179.66 | 360.32 | 7.47  | 100   | -4.74 | 3.05 | 7.25 | -2.31 | 386.40 | 0 | -3.52 |
| 97  | 73.95  | 3h                 | -11.69 | 2.48  | 966.73 | -0.09  | 68.08  | 9.27   | 2239.97 | 731.03 | 90.65  | 9.31  | 100   | -8.88 | 9.41 | 5.75 | -0.10 | 691.58 | 0 | -3.46 |
| 98  | 163.08 | 13b                | -4.80  | 0.20  | 675.61 | -2.93  | 306.97 | 14.44  | 12.15   | 356.52 | 12.11  | 5.34  | 58.16 | -6.21 | 2.01 | 7    | -5.24 | 430.37 | 3 | -3.45 |
| 99  | 65.76  | 3e                 | -9.02  | 1.90  | 822.84 | -0.25  | 73.89  | 44.76  | 1973.11 | 669.51 | 79.43  | 9.58  | 100   | -7.85 | 7.61 | 5    | -0.42 | 534.61 | 0 | -3.33 |
| 100 | 139.22 | 17a                | -5.35  | 0.35  | 680.42 | -2.27  | 238.11 | 3.87   | 54.68   | 429.61 | 12.68  | 8.80  | 74.93 | -6.80 | 2.88 | 6.25 | -3.81 | 414.37 | 2 | -3.17 |
| 101 | 65.76  | 3a                 | -11.45 | 2.48  | 926.19 | -0.02  | 68.10  | 12.71  | 2239.11 | 787.63 | 0      | 8.19  | 100   | -9.00 | 9.27 | 5    | 0     | 617.10 | 0 | -3.14 |
| 102 | 83.93  | 4'-methoxy Pd-C I  | -4.26  | -0.06 | 636.91 | -0.50  | 90.74  | 89.19  | 1365.89 | 166.89 | 379.28 | 11.08 | 100   | -5.12 | 2.75 | 6.95 | -2.31 | 358.39 | 0 | -3.11 |
| 103 | 110.24 | 6l                 | -7.99  | 1.02  | 829.37 | -1.19  | 141.01 | 0.51   | 455.70  | 482.76 | 142.05 | 11.34 | 82.28 | -7.64 | 5.75 | 6.5  | -1.93 | 513.54 | 0 | -3.04 |
| 104 | 112.94 | 6m                 | -8.31  | 1.07  | 846.20 | -1.43  | 158.34 | 0.13   | 312.12  | 459.41 | 163.98 | 10.33 | 79.22 | -7.68 | 5.73 | 6.5  | -2.33 | 513.54 | 0 | -3.03 |
| 105 | 80.304 | 5-                 | -1.76  | -0.48 | 385.52 | -0.85  | 160.77 | 50.53  | 295.99  | 144.97 | 79.77  | 7.47  | 73.96 | -3.70 | 0.47 | 4    | -3.78 | 192.17 | 2 | -2.98 |
| 106 | 112.98 | 6f                 | -7.89  | 0.93  | 823.69 | -1.41  | 158.65 | 0.11   | 309.98  | 498.85 | 101.69 | 10.64 | 90.47 | -7.81 | 5.44 | 6.5  | -2.20 | 499.51 | 0 | -2.70 |
| 107 | 114.24 | 6n                 | -8.57  | 1.11  | 859.57 | -1.48  | 160.26 | 0.14   | 299.28  | 445.03 | 189.68 | 10.52 | 79.23 | -7.73 | 5.78 | 6.5  | -2.42 | 513.54 | 0 | -2.56 |
| 108 | 65.84  | 3d                 | -11.84 | 2.71  | 962.58 | -0.18  | 65.41  | 46.42  | 2374.3  | 731.95 | 165.21 | 10.31 | 100   | -8.86 | 9.46 | 5    | -0.14 | 610.71 | 0 | -2.56 |

|     |        |     |       |       |        |       |        |       |        |        |        |       |       |       |      |      |       |        |   |       |
|-----|--------|-----|-------|-------|--------|-------|--------|-------|--------|--------|--------|-------|-------|-------|------|------|-------|--------|---|-------|
| 109 | 183.95 | 11  | -4.3  | -0.23 | 716.10 | -2.40 | 262.06 | 2.82  | 32.41  | 264.36 | 189.67 | 5.32  | 46.14 | -5.73 | 0.87 | 11.4 | -4.84 | 492.43 | 6 | -2.54 |
| 110 | 121.02 | 6g  | -7.54 | 0.75  | 835.01 | -1.46 | 156.19 | 0.09  | 327.09 | 509.01 | 105.29 | 9.73  | 76.83 | -7.90 | 5.25 | 7.25 | -2.02 | 515.51 | 0 | -2.43 |
| 111 | 140.52 | 13a | -5.09 | 0.37  | 664.77 | -2.30 | 252.36 | 16.99 | 40.06  | 400.25 | 12.14  | 5.21  | 71.81 | -6.36 | 2.76 | 6.25 | -4.18 | 414.37 | 2 | -2.31 |
| 112 | 113.22 | 6a  | -7.83 | 0.86  | 808.13 | -1.19 | 153.58 | 0.12  | 346.29 | 522.13 | 13.51  | 10.54 | 79.05 | -7.82 | 5.56 | 6.5  | -2.03 | 519.93 | 0 | -2.23 |
| 113 | 121.22 | 6i  | -7.38 | 0.72  | 826.23 | -1.46 | 158.11 | 0.42  | 313.68 | 497.56 | 106.09 | 10.89 | 75.96 | -7.77 | 5.16 | 7.25 | -2.10 | 515.51 | 0 | -1.69 |
| 114 | 112.94 | 6c  | -8.02 | 0.88  | 814.45 | -1.22 | 158.15 | 0.92  | 313.39 | 506.80 | 13.42  | 13.37 | 78.62 | -7.80 | 5.62 | 6.5  | -2.16 | 519.93 | 0 | -1.52 |
| 115 | 112.40 | 6k  | -8.24 | 1.06  | 842.44 | -1.32 | 149.67 | 0.12  | 377.16 | 462.23 | 166.30 | 10.67 | 80.89 | -7.66 | 5.76 | 6.5  | -2.17 | 513.54 | 0 | -1.44 |
| 116 | 112.20 | 6j  | -8.16 | 1.05  | 838.50 | -1.34 | 152.36 | 100   | 355.62 | 480.14 | 142.02 | 10.84 | 80.30 | -7.71 | 5.74 | 6.5  | -2.15 | 513.54 | 0 | -1.15 |

Where,

MW= Molecular weight- 130.0 – 725.0

logS= Predicted aqueous solubility

log<sub>o</sub>/w= Predicted octanol/water partition coefficient- -2.0 – 6.5

AccepH= Estimated number of hydrogen bonds that would be accepted by the solute from water molecules in an aqueous solution- 2.0 – 20.0

DonorH= Estimated number of hydrogen bonds that would be donated by the solute to water molecules in an aqueous solution- 0.0 – 6.0

QPPCaco= Predicted apparent Caco-2 cell permeability in nm/sec. Caco2 cells are a model for the gut-blood barrier- <25 poor, >500 great

QPlogBB= Predicted brain/blood partition coefficient- -3.0 – 1.2

%HumanOralAbs= Predicted human oral absorption on 0 to 100% scale-<25 poor, >80% is high

QPlog HERG= Predicted IC50 value for blockage of HERG K<sup>+</sup> channels- concern below -5

SASA=Total solvent accessible surface area -300.0 – 1000.0

FOSA= Hydrophobic component of the SASA- 0.0 – 750.0

FISA=Hydrophilic component of the SASA (SASA on N, O, and H on heteroatoms) 7.0 – 330.0

PISA=  $\pi$  (carbon and attached hydrogen) component of the SASA- 0.0 – 450.0

**Table S2:** MM-GBSA of docked poses of ligand and Lysosomal  $\alpha$ -glucosidase

| Ligand Title                   | dG Bind  | dG_Bind_Co ulomb | dG_Bind_Covalent | dG_Bind_Hbond | dG_Bind_Li po | dG_Bind_Packing | dG_Bind_So lv_GB | dG_Bind_vd W |
|--------------------------------|----------|------------------|------------------|---------------|---------------|-----------------|------------------|--------------|
| Isorutarine                    | -67.7444 | -9.96711         | 4.231813         | -1.71303      | -46.5353      | -0.86858        | 20.12332         | -33.0155     |
| 10                             | -52.2643 | -13.4023         | 1.549819         | -1.32953      | -34.4134      | -0.44602        | 15.72849         | -19.9513     |
| 36                             | -45.3818 | -11.9788         | 0.175291         | -1.1507       | -26.471       | -0.42633        | 21.08744         | -26.6177     |
| 8                              | -59.1848 | -12.9442         | 0.754741         | -1.2184       | -32.7178      | -0.48242        | 18.38014         | -30.9568     |
| 19                             | -50.9809 | -12.2514         | 1.041642         | -1.22003      | -26.5425      | -0.42242        | 15.80082         | -27.387      |
| 15                             | -53.619  | -13.226          | 2.600868         | -1.57864      | -26.6499      | -0.58649        | 9.387111         | -23.566      |
| 5a                             | -62.151  | -13.5968         | 1.488955         | -1.24678      | -32.0043      | -1.70279        | 24.6031          | -39.6925     |
| 22'-<br>Isopropyl<br>psoralene | -54.2447 | 45.00236         | 1.918041         | -1.2347       | -32.6606      | -1.78536        | -26.1077         | -39.3768     |
| 1                              | -54.0868 | 45.02762         | 1.919395         | -1.23554      | -32.6605      | -1.77218        | -25.9839         | -39.3818     |
| 22                             | -54.6778 | -14.5201         | 0.664604         | -1.16397      | -30.2068      | -0.03299        | 19.80444         | -29.2231     |
| 5b                             | -57.214  | -16.6983         | 3.548256         | -1.44997      | -29.7253      | -1.47704        | 27.71414         | -39.1258     |
| 45                             | -57.5478 | -11.7707         | 0.688632         | -1.21878      | -31.338       | -0.50067        | 16.24881         | -29.6572     |
| 4-<br>hydroxyPd-<br>C-III      | -63.9608 | -1.41999         | 7.426241         | -1.02575      | -41.4892      | -0.82467        | 6.996298         | -33.6237     |
| 14                             | -49.4073 | -14.8157         | 0.706875         | -1.16409      | -27.2835      | -0.02702        | 20.55314         | -27.377      |
| 29                             | -50.2617 | -13.6034         | 2.242309         | -0.81446      | -25.8175      | -0.79051        | 15.70535         | -27.1835     |
| 34                             | -59.9071 | -17.8571         | 2.614521         | -1.4644       | -27.6297      | -0.90635        | 10.86982         | -25.5339     |
| 5                              | -49.9345 | -12.4994         | 1.243396         | -1.21908      | -26.435       | -0.42948        | 16.85704         | -27.452      |
| 33                             | -44.5103 | -8.27848         | 1.904996         | -1.32978      | -33.7138      | -0.53004        | 22.53996         | -25.1032     |
| 9d                             | -49.8824 | 23.84013         | 0.980934         | -3.26246      | -26.9153      | -0.00615        | -9.89031         | -34.6293     |
| 43                             | -63.1522 | -13.3061         | 6.648104         | -1.30902      | -31.9031      | -0.91315        | 10.80562         | -33.1745     |
| 25                             | -48.8659 | -15.2176         | 4.378871         | -0.64724      | -31.0833      | -0.80449        | 21.12486         | -26.617      |
| Nodakenin                      | -53.2268 | -2.09675         | 1.458297         | -1.32762      | -32.1728      | -1.49291        | 16.34425         | -33.9393     |
| 16                             | -58.385  | -12.848          | 1.305986         | -1.06063      | -26.4786      | -1.00672        | 8.414435         | -26.7115     |
| 30                             | -56.1746 | -20.2228         | 1.974522         | -1.49599      | -24.939       | -0.90295        | 13.21329         | -23.8017     |
| 9c                             | -49.3398 | 21.26295         | 0.987628         | -3.48581      | -26.4088      | -0.7578         | -9.11407         | -31.8239     |
| 4c                             | -59.2077 | -31.4926         | 5.614982         | -2.34833      | -29.4351      | -1.16348        | 37.27893         | -37.6621     |
| 18                             | -59.5895 | -12.7698         | 0.887466         | -1.06209      | -26.9175      | -0.9886         | 6.191833         | -24.9308     |

|                                           |          |          |          |          |          |           |          |          |
|-------------------------------------------|----------|----------|----------|----------|----------|-----------|----------|----------|
| 14b                                       | -62.9734 | -16.2956 | 1.201922 | -1.03871 | -34.1519 | -1.03009  | 24.53832 | -36.1973 |
| 38                                        | -59.0774 | -9.61697 | 5.639837 | -0.57464 | -31.5138 | -1.07607  | 12.99562 | -34.9314 |
| 23                                        | -54.2091 | -12.6809 | 1.243776 | -1.22015 | -31.0747 | -0.8045   | 19.15091 | -28.8236 |
| 17                                        | -46.6469 | -10.2884 | 1.033163 | -0.89848 | -25.8679 | -6.84E-06 | 18.79108 | -29.4163 |
| 12                                        | -57.227  | -15.2557 | 1.108098 | -1.11255 | -25.6018 | -0.88028  | 10.52304 | -26.0078 |
| 11                                        | -59.0686 | -11.0202 | 1.172668 | -1.05086 | -29.7359 | -0.92134  | 8.486529 | -25.9995 |
| 32                                        | -45.2726 | -11.2019 | 1.678858 | -1.20001 | -25.5414 | -0.77116  | 17.51959 | -25.7566 |
| 35                                        | -44.0241 | -17.0792 | 3.592203 | -0.64242 | -28.9777 | -0.00655  | 24.91974 | -25.8303 |
| 42                                        | -50.496  | -16.5332 | 11.05031 | -0.62669 | -33.1481 | -0.59197  | 24.69446 | -35.3408 |
| 28                                        | -38.9731 | -17.9423 | 3.614301 | -0.63849 | -26.0789 | -0.00578  | 25.94443 | -23.8663 |
| 26                                        | -43.1529 | -8.27845 | 2.058553 | -0.32996 | -29.5591 | -2.80E-07 | 18.90694 | -25.9509 |
| 6h                                        | -65.7036 | -32.7198 | 18.48962 | -2.7935  | -37.3717 | -1.3215   | 37.72118 | -47.7079 |
| 9                                         | -62.2711 | -13.0406 | 2.2037   | -1.10407 | -30.5503 | -0.88318  | 8.221254 | -27.1179 |
| 41                                        | -51.4623 | -8.21612 | 4.332438 | -0.33591 | -36.6203 | -1.52E-06 | 21.45822 | -32.0806 |
| 47                                        | -59.6224 | -15.2646 | 4.409123 | -1.4475  | -29.6269 | -0.91428  | 9.527505 | -26.3058 |
| 46                                        | -46.5074 | -14.2039 | 4.459761 | -0.65326 | -29.9882 | -0.63919  | 22.01994 | -27.5026 |
| 2                                         | -41.0362 | -14.0232 | 0.987193 | -1.16331 | -19.0247 | -0.71379  | 15.9733  | -23.0716 |
| 20                                        | -55.1364 | -9.39554 | 7.167543 | -1.06354 | -39.0321 | -0.97809  | 8.395224 | -20.2299 |
| 31                                        | -39.8473 | -15.171  | 3.592753 | -0.63436 | -26.0765 | -0.00513  | 21.7823  | -23.3355 |
| 21                                        | -64.4847 | -12.2778 | 1.198346 | -1.21206 | -35.5881 | -0.46504  | 18.34639 | -34.4865 |
| 27                                        | -39.8788 | -7.83271 | 2.651738 | -0.42518 | -28.0704 | -0.00097  | 16.73333 | -22.9346 |
| 7                                         | -41.8638 | -1.7864  | 0.032126 | -0.22511 | -26.6854 | -0.62938  | 13.36423 | -25.9339 |
| 4                                         | -58.115  | -11.0893 | 0.916248 | -1.06414 | -26.1487 | -0.85     | 6.748014 | -26.6272 |
| 10a                                       | -57.8203 | -14.5164 | 1.914223 | -1.23725 | -32.6066 | -0.56467  | 27.11568 | -37.9253 |
| Umbellifer<br>on 6-<br>carboxylic<br>acid | -36.9464 | -13.6324 | 0.363215 | -1.55599 | -16.4679 | -4.12E-05 | 15.9701  | -21.6234 |
| 39                                        | -65.4736 | -15.5285 | 6.343861 | -1.00475 | -33.0247 | -0.84977  | 15.42157 | -36.8313 |
| 13                                        | -49.8871 | -18.2786 | 3.302621 | -1.25911 | -25.2735 | -1.4855   | 16.54275 | -23.4357 |
| 24                                        | -60.8599 | -13.6175 | 1.947893 | -1.09477 | -27.9373 | -0.8827   | 8.056534 | -27.3321 |
| 10b                                       | -60.9971 | -17.4902 | 5.938016 | -0.98503 | -32.0326 | -0.76427  | 24.51447 | -40.1775 |
| 17c                                       | -48.686  | 30.42226 | 2.394187 | -1.44641 | -29.9121 | -0.88328  | -19.1521 | -30.1085 |
| 6b                                        | -63.9293 | -25.1522 | 19.0739  | -2.29081 | -41.1547 | -1.00695  | 33.88137 | -47.28   |
| 18b                                       | -61.7045 | -10.664  | 2.583151 | -1.2274  | -33.3925 | -0.94095  | 15.63941 | -33.7022 |
| 6e                                        | -57.1023 | -13.3417 | 21.64364 | -1.50314 | -41.5759 | -1.64135  | 28.1595  | -48.8434 |



|                                                    |          |          |          |          |          |           |          |          |
|----------------------------------------------------|----------|----------|----------|----------|----------|-----------|----------|----------|
| 18a                                                | -67.2473 | -17.8292 | 6.782858 | -0.96115 | -35.4741 | -0.97625  | 15.67943 | -34.4689 |
| 3                                                  | -38.7931 | -11.9731 | 0.302792 | -1.25868 | -17.0609 | -1.39948  | 11.47919 | -18.883  |
| 40                                                 | -47.7854 | -0.73082 | -0.10912 | -0.25246 | -31.2546 | -0.59833  | 13.95385 | -28.7939 |
| 6                                                  | -38.5326 | -4.16022 | 0.944024 | -0.24726 | -26.046  | -0.55787  | 16.94631 | -25.4116 |
| 3'R-<br>oAcetul-<br>4'S-<br>tigloylkhell<br>actone | -55.5834 | -2.78151 | 14.83385 | -0.01807 | -46.3451 | -8.43E-05 | 19.69137 | -40.9639 |
| Decursidin                                         | -67.9514 | -3.78258 | 14.87031 | -1.13961 | -45.7718 | -1.16837  | 13.44715 | -44.4065 |
| 44                                                 | -43.8692 | -3.85741 | 1.53433  | -0.42093 | -29.812  | -0.69951  | 18.04209 | -28.6557 |
| Decursinol                                         | -52.3766 | -5.16579 | 0.817025 | -1.08006 | -29.0689 | -1.32855  | 12.08338 | -28.6338 |
| 9b                                                 | -56.3536 | 31.45671 | 1.401983 | -1.24231 | -30.5319 | -0.00082  | -18.4349 | -39.0023 |
| 4b                                                 | -51.9995 | 31.72783 | 3.965605 | -0.95773 | -27.6469 | -0.67573  | -22.4262 | -35.9864 |
| 10                                                 | -35.462  | -17.1571 | 10.27557 | -2.45084 | -28.9311 | -1.68731  | 38.57231 | -34.0836 |
| 3g                                                 | -53.0049 | -7.12633 | 15.42998 | -1.02147 | -37.7231 | -0.5671   | 24.94159 | -46.9384 |
| 7                                                  | -45.7197 | -10.6331 | 2.229981 | -1.07988 | -20.406  | -0.71404  | 5.858648 | -20.9753 |
| Nodakeneti<br>n                                    | -53.524  | -0.74211 | 1.63483  | -0.1997  | -34.302  | -4.63E-05 | 13.91499 | -33.8299 |
| 13c                                                | -54.7519 | 42.31259 | -0.23174 | -1.14973 | -33.4895 | -1.67915  | -22.72   | -37.7944 |
| 8                                                  | -37.3966 | -5.50635 | 0.328576 | -1.35602 | -16.353  | -1.51227  | 8.016348 | -21.0139 |
| 9                                                  | -40.8394 | -14.4647 | 0.712335 | -1.00261 | -16.871  | -1.323    | 12.53706 | -20.4275 |
| 14a                                                | -64.9731 | -8.86319 | 4.696859 | -0.642   | -38.1912 | -0.06087  | 18.29533 | -40.208  |
| 9a                                                 | -46.6956 | 30.60755 | 2.372651 | -2.3783  | -25.5085 | -1.30851  | -16.5508 | -33.9297 |
| Umbellifer<br>one                                  | -44.5095 | -11.7558 | 0.537832 | -1.04608 | -16.6208 | -0.92178  | 4.462819 | -19.1658 |
| 5'                                                 | -47.4558 | -3.49297 | 0.805648 | -0.50118 | -26.0639 | -0.00619  | 13.31787 | -31.515  |
| 3i                                                 | -54.2671 | -7.65898 | 12.214   | -1.05918 | -38.4452 | -0.59056  | 27.43626 | -46.1634 |
| 3c                                                 | -56.0696 | -7.68768 | 11.091   | -1.0002  | -34.8034 | -0.69589  | 24.3128  | -47.2862 |
| 6                                                  | -13.9321 | -0.69638 | 0.722182 | -0.8002  | -19.2456 | -0.86447  | 30.92991 | -23.9775 |
| 4'                                                 | -15.3848 | -8.41907 | 0.923188 | -0.76014 | -17.6251 | -0.74835  | 33.74168 | -22.497  |
| 4                                                  | -23.304  | -8.73186 | 1.152279 | -1.08295 | -15.9805 | -0.74462  | 23.10449 | -21.0208 |
| 6o                                                 | -55.8555 | -12.1251 | 10.31411 | -0.75055 | -44.2917 | -0.98572  | 36.38161 | -44.3981 |
| 6d                                                 | -55.6568 | -6.42403 | 5.630088 | -1.40925 | -36.9818 | -1.56335  | 27.79111 | -42.6996 |
| 3j                                                 | -58.3631 | -6.0109  | 14.21754 | -0.86988 | -41.605  | -0.65673  | 27.25385 | -50.692  |
| 3b                                                 | -53.7363 | -5.68816 | 8.531591 | -1.08557 | -40.4457 | -0.53084  | 31.95418 | -46.4718 |

|                         |          |          |          |          |          |           |          |          |
|-------------------------|----------|----------|----------|----------|----------|-----------|----------|----------|
| 1                       | -37.256  | -6.83085 | -0.37954 | -1.22646 | -19.3466 | -0.63184  | 12.6085  | -21.4492 |
| 17b                     | -54.0592 | 29.1741  | 9.310025 | -1.02748 | -37.0781 | -0.02242  | -17.245  | -37.1702 |
| 4a                      | -48.1467 | 34.99628 | 3.927855 | -1.30025 | -31.1907 | -1.24178  | -13.4668 | -39.8713 |
| 3f                      | -56.3993 | -6.94995 | 10.25524 | -1.08626 | -42.0644 | -0.63093  | 31.03451 | -46.9576 |
| 4"                      | -43.1194 | -2.1058  | 1.663298 | -0.79927 | -25.8752 | -0.54403  | 11.2051  | -26.6635 |
| angeloylkh<br>ellactone | -51.0081 | -6.06389 | 13.00795 | -0.59645 | -39.0317 | -2.62E-10 | 15.44288 | -33.7668 |
| 3h                      | -68.4125 | -7.87208 | 6.298612 | -0.01882 | -43.7504 | -0.84913  | 31.39592 | -53.6166 |
| 13b                     | -52.3411 | 37.71622 | 1.777886 | -1.05135 | -34.0537 | -1.62081  | -19.9292 | -35.1801 |
| 3e                      | -45.2061 | -2.65949 | 6.74132  | -0.00081 | -37.0146 | -0.28765  | 32.36566 | -44.3505 |
| 17a                     | -37.2592 | 53.86887 | 0.772631 | -0.09728 | -34.006  | -7.34E-07 | -22.9249 | -34.8726 |
| 3a                      | -63.4627 | -7.61171 | 10.06993 | -1.02027 | -43.201  | -0.62125  | 26.32561 | -47.404  |
| 4'-methoxy<br>Pd-C I    | -60.1283 | -0.62891 | 3.634351 | -0.84289 | -36.5235 | -1.15883  | 10.80014 | -35.4087 |
| 6l                      | -68.186  | -7.93839 | 5.157975 | -0.16094 | -40.9914 | -1.37937  | 22.64524 | -45.5191 |
| 6m                      | -56.1854 | -7.43001 | 6.681312 | -1.4843  | -36.8942 | -2.04791  | 28.42066 | -43.431  |
| 5                       | -16.8967 | -18.1361 | 0.468915 | -0.67594 | -19.0507 | -0.01123  | 46.99189 | -26.4836 |
| 5                       | -16.8967 | -18.1361 | 0.468915 | -0.67594 | -19.0507 | -0.01123  | 46.99189 | -26.4836 |
| 6f                      | -49.0039 | -12.227  | 11.79937 | -0.97344 | -39.7797 | -0.77044  | 36.19266 | -43.2454 |
| 6n                      | -41.103  | -29.5506 | 11.97172 | -3.01524 | -33.5406 | -0.20124  | 47.52852 | -34.2955 |
| 3d                      | -64.1257 | -7.55899 | 8.637143 | -1.05905 | -39.0717 | -0.62318  | 27.18271 | -51.6326 |
| 11                      | -27.9311 | -18.1962 | 4.802416 | -0.64616 | -36.1572 | -0.79323  | 60.29103 | -37.2318 |
| 6g                      | -58.4157 | -5.92049 | 4.987861 | -1.74627 | -41.4604 | -1.4188   | 31.41258 | -44.2702 |
| 13a                     | -48.7144 | 36.61914 | 5.700669 | -1.22055 | -32.1202 | -1.25204  | -16.2307 | -40.2106 |
| 6a                      | -60.7239 | -5.6053  | 3.625035 | -1.68974 | -43.2176 | -1.57192  | 31.73685 | -44.0012 |
| 6i                      | -57.135  | -12.9711 | 12.86823 | -0.62746 | -32.0315 | -0.38663  | 19.83495 | -43.8215 |
| 6c                      | -49.3718 | -12.0897 | 13.76565 | -1.23622 | -41.3462 | -0.76882  | 32.81734 | -40.5139 |
| 6k                      | -66.8158 | -1.35996 | 7.137454 | -0.14277 | -39.6212 | -0.36476  | 18.94667 | -51.4112 |
| 6j                      | -63.1173 | -15.9823 | 8.121857 | -0.08087 | -39.4311 | -0.72019  | 26.35665 | -41.3814 |
